# Supplementary material
Source: PubMed Central journal article supplement (PMC4297714)
Supplement: NIHMS622402-supplement-1.pdf [file NIHMS622402-supplement-1.pdf]

**AUTHORSHIP CHANGE FORM**

For all authorship changes, the AACR journals require written correspondence signed by all authors (including the author(s) being added or removed from the paper), explicitly stating the new author list and the reason for the change. Please note that if you are adding an author, the new author must also return a completed copyright transfer form.

Below is a letter you may use as a template. The completed letter should be returned via e-mail to [pubs@aacr.org](mailto:pubs@aacr.org) or via fax to (215) 440-9354.

-----  
 DATE 7-8-14  
 JOURNAL NAME Mol Cancer Res  
 MANUSCRIPT NUMBER MCR-14-0118  
 MANUSCRIPT TITLE Annexin 2- CXCL12 interactions regulate prostate cancer growth in bone marrow  
 AUTHOR(S) ADDED/REMOVED K Yumoto, J Dai, ET Keller  
 (If adding an author(s), the new author(s) must sign; if removing an author(s), the removed author(s) must sign.)

Dear Editor:

We, the undersigned authors agree to the authorship change to our manuscript, as listed above.

Sincerely,

|                  |                                                                                     |             |                       |
|------------------|-------------------------------------------------------------------------------------|-------------|-----------------------|
| Author signature | 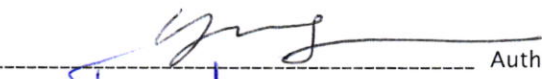 | Author name | Younghun Jung         |
| Author signature |  | Author name | Jingcheng Wang        |
| Author signature |  | Author name | <del>Eunsol</del> Lee |
| Author signature |  | Author name | Samantha McGee        |
| Author signature |  | Author name | Janice E Berry        |
| Author signature |  | Author name | Kenji Yumoto          |
| Author signature | -----                                                                               | Author name | Jinlu Dai             |
| Author signature | -----                                                                               | Author name | Evan T Keller         |
| Author signature |  | Author name | Yusuke Shiozawa       |
|                  |  |             | RUSSELL S. TAICHMAN   |

**AUTHORSHIP CHANGE FORM**

For all authorship changes, the AACR journals require written correspondence signed by all authors (including the author(s) being added or removed from the paper), explicitly stating the new author list and the reason for the change. Please note that if you are adding an author, the new author must also return a completed copyright transfer form.

Below is a letter you may use as a template. The completed letter should be returned via e-mail to [pubs@aacr.org](mailto:pubs@aacr.org) or via fax to (215) 440-9354.

-----  
 DATE 7-8-14  
 JOURNAL NAME Mol Cancer Res  
 MANUSCRIPT NUMBER MCR-14-0118  
 MANUSCRIPT TITLE Annexin 2- CXCL12 interactions regulate prostate cancer growth in bone marrow  
 AUTHOR(S) ADDED/REMOVED K Yumoto, J Dai, ET Keller  
 (If adding an author(s), the new author(s) must sign; if removing an author(s), the removed author(s) must sign.)

Dear Editor:

We, the undersigned authors agree to the authorship change to our manuscript, as listed above.

Sincerely,

|                                     |                                    |
|-------------------------------------|------------------------------------|
| Author signature _____              | Author name <u>Younghun Jung</u>   |
| Author signature _____              | Author name <u>Jingcheng Wang</u>  |
| Author signature _____              | Author name <u>Eunshol Lee</u>     |
| Author signature _____              | Author name <u>Samantha McGee</u>  |
| Author signature _____              | Author name <u>Janice E Berry</u>  |
| Author signature _____              | Author name <u>Kenji Yumoto</u>    |
| Author signature <u>Jinlu Dai</u>   | Author name <u>Jinlu Dai</u>       |
| Author signature <u>Evan Keller</u> | Author name <u>Evan T Keller</u>   |
| Author signature _____              | Author name <u>Yusuke Shiozawa</u> |
| <u>Russell S. Taichman</u>          | <u>RUSSELL S. TAICHMAN</u>         |
